# Supplementary material
Source: publisher figshare collection journal article supplement (https://acs.figshare.com/ndownloader/files/4490767)
Supplement: Supplementary file 1 [file 4490767]

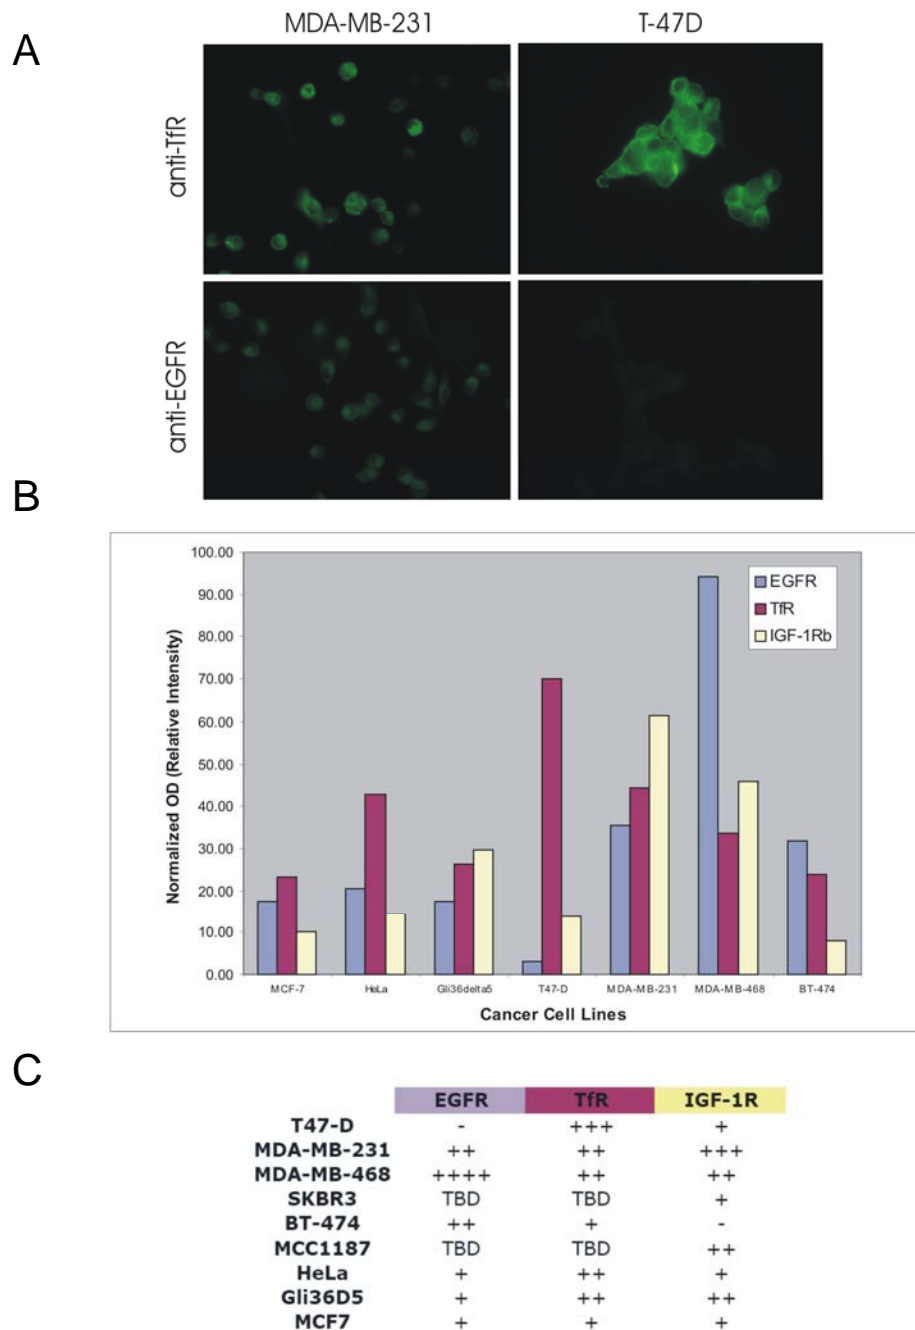

**Supplementary Figure 1** Relative overexpression of the cell surface membrane receptors, EGFR and TfR, in various human cancer cell lines. **A** Immunofluorescence and Western blot data correlate well with receptor expression levels. **B** The graph demonstrates the quantitation of the endogenous levels of each receptor from the Western autoradiograph. **C** The table assigns values to the expression levels to aid in the choice of cancer cell lines for future *in vivo* studies.
